# Supplementary material
Source: PubMed Central journal article supplement (PMC6023555)
Supplement: CONC-25-e209-s001.pdf [file CONC-25-e209-s001.pdf]

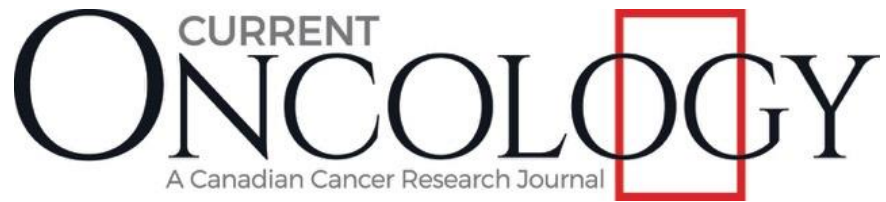

## **Supplemental Materials for**

Harmonization of PD-L1 Testing in Oncology: Canadian Pathology Perspective

D.N. Ionescu, M.R. Downes, A. Christofides, M.S. Tsao

### **Listing of Supplemental Material(s):**

Supplemental Appendix 1: Key ongoing studies of checkpoint inhibitors in NSCLC, HNSCC, and UC

**Appendix A. Key ongoing studies of checkpoint inhibitors in NSCLC, HNSCC, and UC**

| Agent                                        | Study                             | ORR, % | ORR PD-L1 positive, %                | ORR PD-L1 negative, % | PD-L1 cut-off, %        |
|----------------------------------------------|-----------------------------------|--------|--------------------------------------|-----------------------|-------------------------|
| <b>Non-Small Cell Lung Cancer</b>            |                                   |        |                                      |                       |                         |
| <b>Atezolizumab</b>                          | OAK <sup>1</sup> ; 2L/3L          | 14     | 18                                   | 8                     | TC ≥1%                  |
|                                              | BIRCH <sup>2</sup> ; 1L           | 26     | 35                                   | 18                    | TC ≥ 50%<br>or IC ≥ 10% |
| <b>Avelumab</b>                              | JAVELIN <sup>3</sup> ; ≥2L        | 12     | 16                                   | 10                    | TC ≥1%                  |
| <b>Durvalumab</b>                            | Study 1108 <sup>4</sup> ; ≥2L     | NG     | 25                                   | 6                     | TC ≥25%                 |
| <b>Durvalumab + Tremelimumab</b>             | Study 006 <sup>5</sup> ; 1L, ≥2L  | 23     | 22                                   | 29–40                 | TC ≥25%                 |
| <b>Nivolumab</b>                             | CheckMate-057 <sup>6</sup> ; ≥2 L | 19     | 31                                   | 9                     | TC ≥1%                  |
|                                              | CheckMate-017 <sup>7</sup> ; 2L   | 20     | 17                                   | 17                    | TC ≥1%                  |
|                                              | CheckMate-026 <sup>8</sup> ; 1L   | NG     | 26                                   | NG                    | TC ≥5%                  |
| <b>Nivolumab + Ipilimumab</b>                | CheckMate-012 <sup>9</sup> ; 1L   | 38–47  | 57                                   | 0–30                  | TC ≥1%                  |
| <b>Pembrolizumab</b>                         | KEYNOTE-001 <sup>10</sup> ; ≥2 L  | 19     | 30–45                                | 8–19                  | TC ≥50%                 |
|                                              | 1L                                |        |                                      |                       |                         |
|                                              | KEYNOTE-010 <sup>11</sup> ; ≥2 L  | 18     | 29–30                                | NG                    | TC ≥50%                 |
| <b>Pembrolizumab + Chemotherapy</b>          | KEYNOTE-021 <sup>12</sup> ; 1L    | 55     | 54; 80                               | 57; 26                | TC ≥1%;<br>TC ≥50%      |
| <b>Head and Neck Squamous Cell Carcinoma</b> |                                   |        |                                      |                       |                         |
| <b>Durvalumab</b>                            | Study 1108 <sup>13</sup> ; ≥2 L   | 7/62   | -No difference in OS by PD-L1 status |                       | TC ≥25%                 |

|                             |                                          |                |                                                |              |                           |
|-----------------------------|------------------------------------------|----------------|------------------------------------------------|--------------|---------------------------|
| <b>Nivolumab</b>            | CheckMate-141 <sup>14,15</sup> ;<br>≥2 L | 7.5 mo<br>(OS) | 8.7 (OS);<br>18 (ORR)                          | NG (HR 0.56) | TC ≥1%                    |
| <b>Pembrolizumab</b>        | KEYNOTE-012 <sup>16</sup> ; ≥2<br>L      | 18             | -PD-L1 associated with best ORR (p =<br>0.010) |              | TC or IC<br>≥1%           |
|                             | Chow et al. <sup>17</sup> ; ≥2 L         | 20             | 50                                             | NG           | TC ≥1% for<br>study entry |
| <b>Urothelial Carcinoma</b> |                                          |                |                                                |              |                           |
| <b>Atezolizumab</b>         | iMvigor-210 <sup>18</sup> ;<br>2L        | 15             | 18–26                                          | 8–11         | TC ≥1%;<br>≥5%            |
| <b>Avelumab</b>             | JAVELIN <sup>19</sup> ;<br>2L            | 18             | 50                                             | 4            | TC ≥5%                    |
| <b>Durvalumab</b>           | Study 1108; <sup>20</sup><br>1L, 2L, ≥3L | 17.8           | 27.6                                           | 5.1          | TC or IC ≥<br>25%         |
| <b>Pembrolizumab</b>        | KEYNOTE-012 <sup>21</sup> ;<br>≥3 L      | 25             | 38                                             | NG           | TC ≥1%                    |
|                             | KEYNOTE-045 <sup>22</sup> ; 2L           | 21.1           | 21.6                                           | NG           | TPS* ≥10%                 |
|                             | KEYNOTE-052 <sup>23</sup> ;<br>1L        | 23             | 21–28                                          | 21           | IC ≥1% and<br><5%         |
| <b>Nivolumab</b>            | CheckMate-032 <sup>24</sup> ;<br>2L      | 24             | 24                                             | 26           | TC ≥1%                    |
|                             | CheckMate-275 <sup>25</sup> ;<br>2L      | 20             | 24; 28                                         | 16; 16       | TC ≥1%;<br>≥5%            |

HR, hazard ratio; NG, not given; ORR, overall response rate; OS, overall survival; PD-L1, programmed death ligand-1; TPS, tumour proportion score

\*Percentage of PD-L1-expressing tumor and infiltrating immune cells relative to the total number of tumor cells

1. Rittmeyer A, Barlesi F, Waterkamp D, et al. Atezolizumab versus docetaxel in patients with previously treated non-small-cell lung cancer (OAK): a phase 3, open-label, multicentre randomised controlled trial. *Lancet* 2017;389:255-65.
2. Costa EC, Felip E, Reck M, Patel J, Heist R. Updated Efficacy Results From the BIRCH Study: First-Line Atezolizumab Therapy in PD-L1–Selected Patients With Advanced NSCLC. International Association for the Study of Lung Cancer Meeting 2017;Abstract OA17.02.
3. Gulley JL, Rajan A, Spigel DR, et al. Avelumab for patients with previously treated metastatic or recurrent non-small-cell lung cancer (JAVELIN Solid Tumor): dose-expansion cohort of a multicentre, open-label, phase 1b trial. *Lancet Oncol* 2017;18:599-610.
4. Balmanoukian AS, Antonia SJ, Hwu W-J, et al. Updated safety and clinical activity of durvalumab monotherapy in previously treated patients with stage IIIB/IV NSCLC. *Journal of Clinical Oncology* 2017;35:9085-.
5. Antonia S, Goldberg SB, Balmanoukian A, et al. Safety and antitumour activity of durvalumab plus tremelimumab in non-small cell lung cancer: a multicentre, phase 1b study. *Lancet Oncol* 2016;17:299-308.
6. Borghaei H, Paz-Ares L, Horn L, et al. Nivolumab versus Docetaxel in Advanced Nonsquamous Non-Small-Cell Lung Cancer. *N Engl J Med* 2015;373:1627-39.
7. Brahmer J, Reckamp KL, Baas P, et al. Nivolumab versus Docetaxel in Advanced Squamous-Cell Non-Small-Cell Lung Cancer. *N Engl J Med* 2015;373:123-35.
8. Carbone DP, Reck M, Paz-Ares L, et al. First-Line Nivolumab in Stage IV or Recurrent Non-Small-Cell Lung Cancer. *N Engl J Med* 2017;376:2415-26.
9. Hellmann MD, Rizvi NA, Goldman JW, et al. Nivolumab plus ipilimumab as first-line treatment for advanced non-small-cell lung cancer (CheckMate 012): results of an open-label, phase 1, multicohort study. *The Lancet Oncology*;18:31-41.
10. Garon EB, Rizvi NA, Hui R, et al. Pembrolizumab for the treatment of non-small-cell lung cancer. *N Engl J Med* 2015;372:2018-28.
11. Herbst RS, Baas P, Kim D-W, et al. Pembrolizumab versus docetaxel for previously treated, PD-L1-positive, advanced non-small-cell lung cancer (KEYNOTE-010): a randomised controlled trial. *The Lancet*;387:1540-50.
12. Langer CJ, Gadgeel SM, Borghaei H, et al. Carboplatin and pemetrexed with or without pembrolizumab for advanced, non-squamous non-small-cell lung cancer: a randomised, phase 2 cohort of the open-label KEYNOTE-021 study. *Lancet Oncol* 2016;17:1497-508.
13. Segal NH, Ou SI, Balmanoukian AS, Massarelli E, Brahmer JR, Weiss J. Updated safety and efficacy of durvalumab (MEDI4736), an anti-PD-L 1 antibody, in patients from a squamous cell carcinoma of the head and neck. *Annals of Oncology* 2016;27:Abstract 9490.
14. Gillison ML, Blumenschein G, Fayette J, et al. Abstract CT099: Nivolumab (nivo) vs investigator's choice (IC) for recurrent or metastatic (R/M) head and neck squamous cell carcinoma (HNSCC): CheckMate-141. *Cancer Research* 2016;76:CT099-CT.
15. Ferris RL, Blumenschein GR, Fayette J, Guigay J. Further evaluations of nivolumab (nivo) versus investigator's choice (IC) chemotherapy for recurrent or metastatic (R/M) squamous cell carcinoma of the head and neck (SCCHN): CheckMate 141. *J Clin Oncol* 2016;34.
16. Seiwert TY, Burtneß B, Mehra R, et al. Safety and clinical activity of pembrolizumab for treatment of recurrent or metastatic squamous cell carcinoma of the head and neck (KEYNOTE-012): an open-label, multicentre, phase 1b trial. *The Lancet Oncology*;17:956-65.
17. Chow LQ, Burtneß B, Weiss J, et al. LBA31A PHASE IB STUDY OF PEMBROLIZUMAB (PEMBRO; MK-3475) IN PATIENTS (PTS) WITH HUMAN PAPIILLOMA VIRUS (HPV)-POSITIVE AND NEGATIVE HEAD AND NECK CANCER (HNC). *Annals of Oncology* 2014;25:mdu438.32-mdu.32.

18. Rosenberg JE, Hoffman-Censits J, Powles T, et al. Atezolizumab in patients with locally advanced and metastatic urothelial carcinoma who have progressed following treatment with platinum-based chemotherapy: a single-arm, multicentre, phase 2 trial. *Lancet* 2016;387:1909-20.
19. Apolo AB, Infante JR, Hamid O, et al. Avelumab (MSB0010718C; anti-PD-L1) in patients with metastatic urothelial carcinoma from the JAVELIN solid tumor phase 1b trial: Analysis of safety, clinical activity, and PD-L1 expression. *Journal of Clinical Oncology* 2016;34:4514-.
20. Powles T, O'Donnell PH, Massard C, et al. Efficacy and Safety of Durvalumab in Locally Advanced or Metastatic Urothelial Carcinoma: Updated Results From a Phase 1/2 Open-label Study. *JAMA oncology* 2017;3:e172411.
21. Plimack ER, Bellmunt J, Gupta S, et al. Pembrolizumab (MK-3475) for advanced urothelial cancer: Updated results and biomarker analysis from KEYNOTE-012. *Journal of Clinical Oncology* 2015;33:4502-.
22. Bellmunt J, de Wit R, Vaughn DJ, et al. Pembrolizumab as Second-Line Therapy for Advanced Urothelial Carcinoma. *N Engl J Med* 2017;376:1015-26.
23. Balar A BJ, O'Donnell PH, . Pembrolizumab (pembro) as first-line therapy for advanced/unresectable or metastatic urothelial cancer: Preliminary results from the phase II KEYNOTE-052 study. Presented at: 2016 ESMO Congress October 7-11, 2016;Abstract LBA32.
24. Rosenberg JE BP, Kim J, Spiliopoulou P. Nivolumab monotherapy in metastatic urothelial cancer (mUC): Updated efficacy by subgroups and safety results from the CheckMate 032 study. Presented at: 2016 ESMO Congress 2016;Abstract 784P.
25. Galsky MD RM, Siefker-Radtke AO, Baron A, Necchi A,. Efficacy and safety of nivolumab monotherapy in patients with metastatic urothelial cancer (mUC) who have received prior treatment: Results from the phase II CheckMate 275 study. Presented at: 2016 ESMO Congress 2016;Abstract LBA31.
